# Supplementary material
Source: MDPI journal article supplement (https://www.mdpi.com/2311-7524/7/10/389)
Supplement: s1 [file s1]

>Pn1 (950 bp)

CTGCGGAGGATCATTACCACACCTAAAAAACTTTCCACGTGAACCGTTTCAACCCAATAGTTGGGGGTCT  
TATTTGGCGGCGGCTGCTGGCTTAATTGTTGGCGGCTGCTGCTGAGTGAGCCCTATCAAAAAAAGGCGA  
ACGTTTGGGCTTCGGCCTGATTTATTAGTCTTTTTTCTTTTAAACCCATTCCTTAATACTGAATATACT  
GGGGGGACAAAAGTCTCTGCTTTTAACTAGATAGCAACTTTCACCAGTGGATGTCTAGGCTCCACATCG  
ATAAAAAACGCTGCGAACTGCGATACGTAATGCGAATTGCAGGATTCAGTGAGTCATCGAAATTTTGAAC  
GCATATTGCACTTCGGGTTAGTCCTGGAAGTATGCCTGTATCAGTGTCCGTACATTAACTTGACTTTC  
TTCCTTCCCTGTAGTCGGGGGAGGAAATGTCAAATGTGAAGTGTCTTGCGATTGGTCTTCGGACCGGCTG  
CGAGTCCTTTTAAATGTACTAACTGAACTTCTCTTGCTCGAAAAGTGGTGGCGTTGCTGGTTGTGAAG  
GCTGCTATTGTGGCAAATTGGCGACTGGTTTGTCTGCTGCGGCGTTAATGGAAAAGTGTTCGATTCTGG  
TATGGTTGGCTTCGGCTGAACAATGCACCTTATTGGACGTTTTTCTGCTGTGGCGGGATGGACTGGGGAA  
CCATAACTCGGTGGCTTGGCTTTTGAATTGGCTTTGCTGTTGCGAAAAAAGGGGGCAGCTTCGGTTGTCA  
AGGTCGATCCATTTGGGAACTTAATGGGTACTTCGGATGCATCTCAATTGGACCTGAATATCAGGCAAAA  
ATTACCCCTGAACTTAAGCATATCAAAA
